# Supplementary material for: La6Si4S17:Ce3+: luminescence and lighting applications of a novel green-emitting phosphor
Source: Royal Society of Chemistry journal article supplement (doi:10.1039/c8dt02759e), 2018-01-01
Supplement: c8dt02759e1.pdf [file c8dt02759e1.pdf]

## Supporting Information file

# **La<sub>6</sub>Si<sub>4</sub>S<sub>17</sub>:Ce<sup>3+</sup>: Luminescence and Lighting Application of a Novel Green-Emitting Phosphor**

*Jiun-Yih Yang<sup>#</sup>, Somrita Dutta<sup>#</sup> and Teng-Ming Chen<sup>\*</sup>*

Department of Applied Chemistry, National Chiao Tung University, Hsinchu 30010, Taiwan.

<sup>#</sup> Contributed Equally

<sup>\*</sup> E-mail: [tmchen@mail.nctu.edu.tw](mailto:tmchen@mail.nctu.edu.tw)

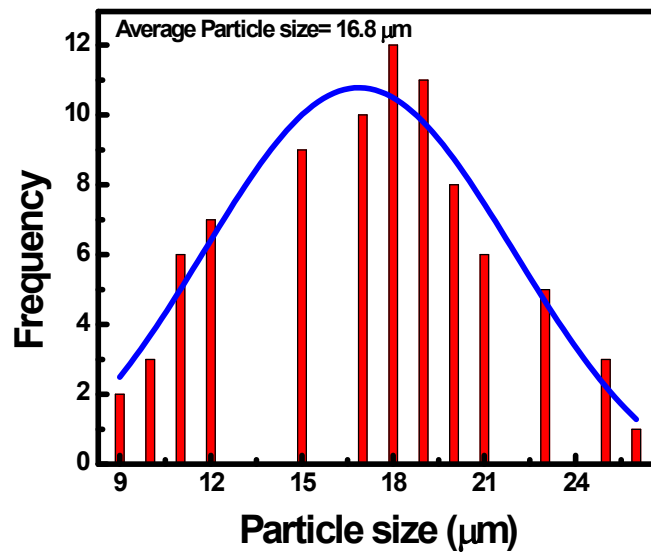

Figure S1: Particle size distribution of  $(La_{0.95}Ce_{0.05})_6Si_4S_{17}$  phosphor.

Fig. S1 displays the particle size distribution of the  $(La_{0.95}Ce_{0.05})_6Si_4S_{17}$  phosphor. The particle size distribution was carried out via LS- 235 particle size analyzer. From the figure it is clear that the size distribution is narrow with average particle size being 16.8 $\mu m$ .

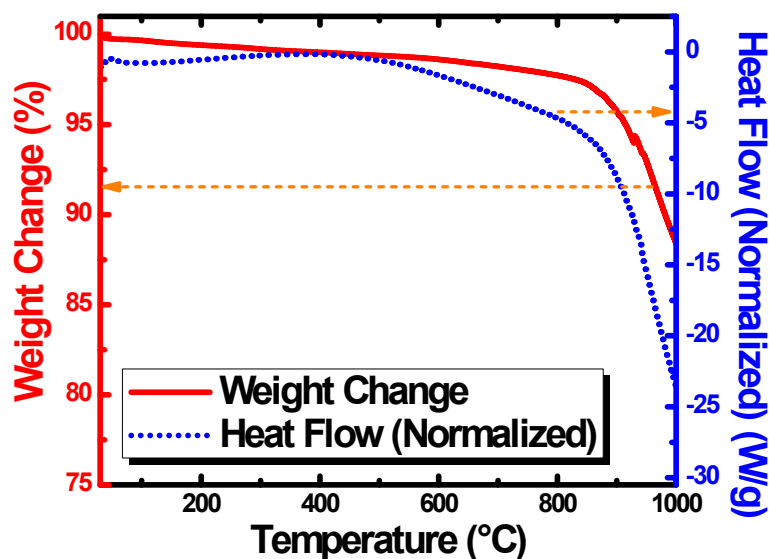

Figure S2: TG-DSC thermal analysis curves of  $(\text{La}_{0.95}\text{Ce}_{0.05})_6\text{Si}_4\text{S}_{17}$  phosphor.

Figure S2 show the TG- DSC curves of the  $\text{Ce}^{3+}$  doped  $\text{La}_6\text{Si}_4\text{S}_{17}$  phosphor. The thermal analysis was carried out via the heat-treatment in  $\text{N}_2$  atmosphere up to  $1000^\circ\text{C}$ . The heating rate was fixed at  $10^\circ\text{C}/\text{min}$ . One shallow band at  $\sim 100^\circ\text{C}$  in the DSC curve was observed owing to the evaporation of water. For the TG curve, there also existed one stage of weight loss of nearly 0.25% in the lower temperature range due to the evaporation of water. Upto  $800^\circ\text{C}$ , the negligible weight loss was found. It indicated the thermal stability of the  $\text{La}_6\text{Si}_4\text{S}_{17}$  phosphor.
